# Supplementary material
Source: MDPI journal article supplement (https://www.mdpi.com/2037-0164/13/3/18)
Supplement: s1 [file s1]

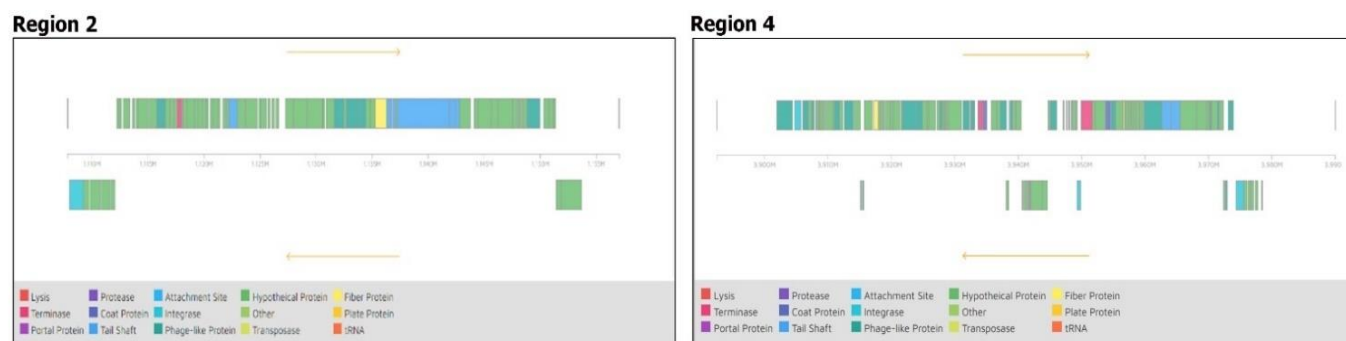

**Figure S1.** Intact Prophage founded in *B. velezensis* KS04AU. PHAGE\_Aeriba\_AP45\_NC\_048651 (region 2) and PHAGE\_Paenib\_Tripp\_NC\_02893 (region 4).

**Table S1.** Comparative analysis of functional subsystem category in genomes of *B. velezensis* SCRM102752 KS04AU, FZB42, ONU553, and *B. amyloliquefaciens* LL3 and IT-45 based on SEED servers.

| Subsystem Features                                 | KS04A<br>U | ONU-553 | SRCM102752 | IT-45 | JS25R | FZB42 | LL3 |
|----------------------------------------------------|------------|---------|------------|-------|-------|-------|-----|
| Cofactors, Vitamins, Prosthetic Groups, Pigments   | 150        | 147     | 147        | 147   | 148   | 147   | 145 |
| Cell Wall and Capsule                              | 81         | 77      | 77         | 78    | 76    | 73    | 89  |
| Virulence, Disease and Defense                     | 36         | 36      | 39         | 39    | 37    | 38    | 37  |
| Potassium metabolism                               | 3          | 3       | 3          | 3     | 3     | 3     | 3   |
| Miscellaneous                                      | 24         | 24      | 24         | 24    | 24    | 24    | 23  |
| Phages, Prophages, Transposable elements, Plasmids | 14         | 8       | 8          | 14    | 4     | 0     | 14  |
| Membrane Transport                                 | 41         | 41      | 41         | 41    | 41    | 42    | 41  |
| Iron acquisition and metabolism                    | 23         | 23      | 26         | 23    | 24    | 25    | 27  |
| RNA Metabolism                                     | 56         | 56      | 64         | 67    | 66    | 64    | 63  |
| Nucleosides and Nucleotides                        | 99         | 94      | 93         | 94    | 95    | 95    | 106 |
| Protein Metabolism                                 | 183        | 209     | 211        | 213   | 200   | 211   | 202 |
| Cell Division and Cell Cycle                       | 6          | 6       | 6          | 6     | 6     | 6     | 6   |
| Motility and Chemotaxis                            | 44         | 43      | 42         | 42    | 43    | 42    | 43  |
| Regulation and Cell signaling                      | 27         | 27      | 26         | 26    | 27    | 28    | 27  |
| Secondary Metabolism                               | 6          | 6       | 7          | 7     | 6     | 6     | 6   |
| DNA Metabolism                                     | 62         | 59      | 62         | 59    | 64    | 63    | 65  |
| Fatty Acids, Lipids, and Isoprenoids               | 56         | 54      | 53         | 54    | 54    | 53    | 50  |
| Nitrogen Metabolism                                | 20         | 20      | 20         | 19    | 21    | 20    | 19  |
| Dormancy and Sporulation                           | 92         | 92      | 91         | 92    | 91    | 91    | 97  |
| Respiration                                        | 40         | 40      | 40         | 41    | 40    | 40    | 41  |
| Stress Response                                    | 44         | 44      | 43         | 45    | 43    | 43    | 45  |
| Metabolism of Aromatic Compounds                   | 12         | 12      | 12         | 12    | 12    | 13    | 12  |
| Amino Acids and Derivatives                        | 302        | 302     | 305        | 293   | 302   | 301   | 300 |
| Sulfur Metabolism                                  | 6          | 6       | 6          | 6     | 7     | 6     | 6   |
| Phosphorus Metabolism                              | 12         | 11      | 18         | 16    | 12    | 12    | 11  |

**Table S2.** Analysis of mobile genetic elements (IS-Elements) of genome *Bacillus velezensis* KS04AU, JS25R, FZB42, ONU-553, and SRCM102752.

| №  | KS04AU   | JS25R    | FZB42    | ONU 553  | SRCM102752 |
|----|----------|----------|----------|----------|------------|
| 1  | ISBsu1   | ISBsu1   | ISBsu1   | ISBsu1   | ISBsu1     |
| 2  | ISErh1   | ISPana1  | ISBce5   | ISErh1   | ISBce5     |
| 3  | ISCco2   | ISBsu3   | ISBce7   | ISCco2   | ISBce7     |
| 4  | ISBt2    | ISCco2   | ISBth4   | ISBt2    | IS231Y     |
| 5  | ISTli1   | ISAUr1   | IS231Y   | ISTli1   | ISBth4     |
| 6  | ISLmo1   | ISTli1   | ISBce8   | ISLmo1   | ISBce8     |
| 7  | ISSau4   | ISCot1   | ISErh1   | ISSau4   | ISErh1     |
| 8  | ISCot1   | ISSsu2   | MICBce5  | ISCot1   | MICBce5    |
| 9  | ISSsu2   | ISClidi1 | MICBce6  | ISSsu2   | MICBce6    |
| 10 | IS1170   | ISAbal7  | ISBsu3   | IS1170   | ISBt2      |
| 11 | ISClidi1 | ISAUsp1  | MICBth1  | ISClidi1 | MICBth1    |
| 12 | ISAbal7  | ISPlu5   | ISTli1   | ISAUsp1  | ISTli1     |
| 13 | ISCh5    | ISCosp2  | ISLmo1   | ISAbal7  | ISLmo1     |
| 14 | ISAUsp1  | ISRtr6   | ISBce2   | ISCh5    | ISBce2     |
| 15 | ISPlu5   | ISSag12  | ISSau4   | ISPlu5   | ISSau4     |
| 16 | ISMtsp1  | ISPth1   | MICBce2  | ISCfr8   | MICBce2    |
| 17 | ISCfr8   | ISPal1   | IS231D   | ISPth1   | IS231D     |
| 18 | ISRtr6   | ISMlo5   | ISPana1  | ISMaq6   | ISSsu2     |
| 19 | ISSag12  | ISPfr16  | ISSsu2   | ISKol1   | IS1170     |
| 20 | ISPth1   | ISKol1   | ISBth19  | ISMxa3   | ISlse1     |
| 21 | ISPal1   | ISAd3    | ISAUsp1  | ISAUu4   | ISClidi1   |
| 22 | ISMaq6   | ISCh11   | ISBce4   | ISAzvi9  | ISChh1     |
| 23 | ISPfr16  | ISSsu4   | IS231R   | ISRru1   | ISDpr8     |
| 24 | ISKol1   | ISAUu4   | ISPa72   | IS30H    | ISAbal7    |
| 25 | ISDpr6   | ISLsp3   | ISCfr8   | ISRtr6   | ISCh5      |
| 26 | ISDpr5   | ISAzvi9  | ISDph1   | ISSag12  | ISOba2     |
| 27 | ISAd3    | ISSav4   | ISSag12  | ISPal1   | ISAUsp1    |
| 28 | ISSsu4   | ISMmy2   | ISCot1   | ISPfr16  | ISBce4     |
| 29 | ISMxa3   | ISFal3B  | ISPth1   | ISDpr6   | IS231R     |
| 30 | ISAUu4   | ISFal3A  | ISShes11 | ISDpr5   | ISCfr8     |
| 31 | ISFnu8   | IS943    | ISPal1   | ISAd3    | ISRtr6     |
| 32 | ISllo12  | ISSis2   | ISMaq6   | ISSsu4   | ISAeme4    |
| 33 | ISAzvi9  | ISLhe6   | ISPfr16  | ISFnu8   | ISCysp21   |
| 34 | ISSav4   | IS231T   | ISKol1   | ISSav4   | ISCco2     |
| 35 | ISMmy2   | IS231R   | ISOih1   | ISRba1   | ISSag12    |
| 36 | ISFal3B  | ISRru1   | ISAd3    | ISMmy2   | ISCot1     |
| 37 | ISFal3A  | ISNg1    | ISLsp3   | ISFal3B  | ISGob7     |
| 38 | IS943    | IS30H    | ISSso4   | ISFal3A  | ISPth1     |
| 39 | ISSis2   | IS1170   | ISAzvi9  | IS943    | ISPal1     |
| 40 | ISAbal5  |          | ISSav4   | ISSis2   | ISMaq6     |
| 41 | ISLhe6   |          | ISRba1   | ISAbal5  | ISPfr16    |
| 42 | IS231T   |          | ISFal3B  | ISLhe6   | ISKol1     |
| 43 | IS231R   |          | ISFal3A  | IS231T   | ISOih1     |
| 44 | ISSf1    |          | IS943    | IS231R   | ISAd3      |
| 45 | ISRru1   |          | ISSis2   | ISSpo1   | ISMxa3     |
| 46 | IS30H    |          | ISLhe6   | ISSf1    | ISLsp3     |
| 47 | IS1182   |          | IS231T   | IS1182   | ISAzvi9    |
| 48 |          |          | ISSf1    |          | ISSav4     |
| 49 |          |          | ISM1     |          | ISMmy2     |
| 50 |          |          | IS30H    |          | ISFal3B    |
| 51 |          |          | IS1221I  |          | ISFal3A    |

|    |  |  |         |  |        |
|----|--|--|---------|--|--------|
| 52 |  |  | IS1221G |  | IS943  |
| 53 |  |  | IS1170  |  | ISSis2 |
| 54 |  |  |         |  | ISLhe6 |
| 55 |  |  |         |  | IS231T |
| 56 |  |  |         |  | ISSf1  |
| 57 |  |  |         |  | IS30H  |
| 58 |  |  |         |  | IS231W |
| 59 |  |  |         |  | IS231V |
| 60 |  |  |         |  | IS231K |

**Table S3.** Mobile genetic elements (IS-Elements) shared between genomes used in this study.

[illegible]
